# Supplementary material
Source: PubMed Central journal article supplement (PMC3570653)

## **SUPPLEMENTAL METHODS**

### **Animals**

Mouse experiments were approved by Yale's Institutional Animal Care and Use Committee. The CC10-tTS-rtTA-TGF- $\beta$ 1 transgenic mice used in this study employ the Clara cell 10-kDa protein (CC10) promoter to specifically express bioactive human TGF- $\beta$ 1 to the lung (17). The Semaphorin 7a null mice have been described previously (1) and were a gift from Dr. Alex Kolodkin, Johns Hopkins University. Mice with null mutations of CD4 or CD19 were purchased from Jackson Laboratories. All mice were backcrossed for >10 generations onto a C57BL/6 background.

### **Human subjects**

Studies were performed with approval from the Human Investigation Committee at Yale and the Institutional Review Board of the University of Pittsburgh. Subjects diagnosed with IPF based on current ATS criteria (2, 3) were eligible and were excluded based on: (1) Inability to provide informed consent; (2) Non-fibrotic lung disease; (3) Unstable cardiac, vascular, or neurologic disease; (4) Malignancy; (5) Pregnancy; (6) chronic infection. Clinical data including age, sex, race/ethnicity, co-morbidities, medications and percent-predicted Forced Vital Capacity (FVC) and Diffusion Capacity of Carbon Monoxide (DLCO) were collected. Age-matched controls were free of inflammatory conditions and were recruited from the local community and from Yale's Program on Aging. Subjects with IPF were followed prospectively for one year and categorized as "progressive" if they met one of the following three composite criteria: >10% decline in percent-predicted FVC, acute exacerbation according to the criteria of Collard et al (4), or death.

### **Doxycycline Administration**

8-10 week old TGF- $\beta$ 1 Tg<sup>+</sup> or their wild-type littermate controls (transgene negative, Tg<sup>-</sup>) mice were given doxycycline 0.5 mg/ml in their drinking water for up to 2 weeks.

### **Bone Marrow Transplantation**

Bone marrow chimeras of the TGF- $\beta$ 1 and Sema 7a<sup>-/-</sup> mice were created as previously described (5). Briefly, recipient mice were lethally irradiated with 800 cGy using a Seimens stabilipan Cesium irradiator. Donor mice were sacrificed and bone marrow was obtained by flushing the femurs with DMEM supplemented with 5% fetal bovine serum. Approximately eight hours after irradiation, recipient mice received  $1 \times 10^6$  whole bone marrow derived cells (BMDCs) via tail vein injection. Following marrow transfer, recipient mice received antibiotics in their drinking water until the time of transgene activation.

### **Adoptive Transfer of Tregs**

Regulatory T cells were generated and injected via tail vein every 72 hours in a modification of previously described protocols (6, 7). All procedures were performed under sterile conditions. Briefly, CD4<sup>+</sup>CD25<sup>-</sup> cells were isolated from murine spleens using magnetic labeled beads (Miltenyi, Auburn, CA). Purity of CD4<sup>+</sup>CD25<sup>-</sup> population was assessed by flow cytometry. Cells were cultured in antibiotic free RPMI and stimulated with monoclonal antibodies against CD3 and CD28 (kind gift of Dr. Lauren Cohn, Yale University) in the presence of recombinant murine TGF- $\beta$ 1 (R&D Systems) for 5 days. Treg phenotype was confirmed by FACS. Sema 7a expression was assessed using immunofluorescence as above.  $5 \times 10^5$  cells were adoptively transferred into TG-F $\beta$ 1 x Sema 7a<sup>-/-</sup> mice via tail vein injection starting from the night before doxycycline administration.

### **Animal Sacrifice**

Bronchoalveolar lavage, tissue harvest, and Luminex determination of BAL cytokines were performed as described (5, 8).

### **Flow cytometric analysis**

Processing of mouse or human lung and PBMCs for FACS was performed as previously described (5, 9). Tregs were identified using mouse or human Regulatory T Cell Staining Kit (EBioscience, San Diego, CA). Intracellular cytokine staining was performed using the Th1/Th2/Th17 Phenotyping Kit (BD Pharmingen, Franklin Lakes, NJ). PE-labeled anti-human Semaphorin 7a antibody was obtained from R&D Systems (Minneapolis, MN). Flow cytometry was performed using a BD FACSCalibur. Data were analyzed using Flow Jo v 7.5 software (Tree Star, Inc, Ashland, OR).

### **Sircol Analysis**

Lung collagen was measured by Sircol Assay (Biocolor Ltd., UK) as previously described (5).

### **Histologic Analysis**

Formalin-fixed and paraffin-embedded lung sections were stained with hematoxylin/eosin or Mallory's trichrome stains. Sema 7a immunohistochemistry was performed using anti-human Sema 7a antibody (Genetex, Irvine, CA).

### **Immunofluorescence**

Immunofluorescence of mouse lung digests was performed using antibodies against CD19, CD4, F4/80 (BD Pharmingen) and Sema 7a (Genetex, Irvine CA). Fluorochrome-conjugated secondary antibodies were obtained from Invitrogen (Carlsbad, CA). Slides were counterstained with DAPI and mounted with vectashield. Microscopy was performed using a Nikon Eclipse Ti-S microscope equipped with a Andor Technology camera

### **Quantitative Real Time PCR**

RNA was isolated and reverse transcribed as we have previously described (10). Primers against human and/or murine Sema 7a,  $\beta$ -actin, TGF- $\beta$ 1, IL-10, and GAPDH were obtained from Superarray Bioscience (Frederick, MD). Quantitative PCR was performed using an ABI 7500.

### **Statistical Analysis**

Data were assessed for normalcy using the D'Agostino and Pearson Omnibus test. Parametric data were compared by Student's t-test or ANOVA. Nonparametric data were compared using the Mann-Whitney U test. Categorical data were compared using Fischer's exact test. Statistical analysis was performed using SAS (Research Triangle Park, NC). Graphs were generated using Graphpad (Graphpad Software Inc., La Jolla, CA).

**Table S1. Baseline characteristics of subjects**

|                            | IPF<br>N=38             | Control<br>N=42        | P value |
|----------------------------|-------------------------|------------------------|---------|
| Age, years                 | 69.76<br>(59.97– 71.30) | 65.60<br>(59.9 - 71.3) | 0.2088  |
| Sex                        |                         |                        |         |
| Female                     | 8 (21.05%)              | 22 (52.4%)             | 0.0038  |
| Male                       | 30(78.95%)              | 20 (47.6%)             |         |
| Race                       |                         |                        |         |
| Caucasian                  | 34 (89.47%)             | 38 (90.5%)             | 0.2850  |
| Not Caucasian              | 4 (10.53%)              | 4 (9.5%)               |         |
| FVC,<br>Percent Predicted  | 67.05<br>(62.47– 71.63) | NA                     | NA      |
| DLCO,<br>Percent Predicted | 44.00<br>(39.13- 48.86) | NA                     | NA      |

Data are expressed as mean with 95% confidence intervals.

**Table S2. P values of CD19+ Sema 7a+ cells compared by disease severity.**

|                                                                        | % CD19+ cells also expressing Sema 7a | Number of CD19 cells expressing Sema 7a |
|------------------------------------------------------------------------|---------------------------------------|-----------------------------------------|
| Comparison of %FVC equal to or above vs. below the median value (66% ) | 0.38                                  | 0.61                                    |
| Comparison of %DLCO equal to or above vs. below the median value (50%) | 0.29                                  | 0.30                                    |

**Table S3. P values of CD4+ Sema 7a+ cells compared by disease severity.**

|                                                                        | %CD4+ cells also expressing Sema 7a | Number of CD4 cells expressing Sema 7a |
|------------------------------------------------------------------------|-------------------------------------|----------------------------------------|
| Comparison of %FVC equal to or above vs. below the median value (66% ) | 0.22                                | 0.14                                   |
| Comparison of %DLCO equal to or above vs. below the median value (50%) | 0.49                                | 0.54                                   |

**Table S4. P values of Sema 7a+ Tregs compared by disease severity.**

|                                                                             | % of Tregs expressing Sema 7a | Number of Tregs expressing Sema 7a |
|-----------------------------------------------------------------------------|-------------------------------|------------------------------------|
| Comparison of %Pred FVC equal to or above vs. below the median value (66%)  | 0.31                          | 0.97                               |
| Comparison of %Pred DLCO equal to or above vs. below the median value (50%) | 0.30                          | 0.69                               |

%FVC = percent predicted forced vital capacity

%DLCO = percent predicted diffusion capacity for carbon monoxide

**Tables S2 – S4.** Objective parameters of disease severity were divided at the median value. Percentages and quantities of Sema 7a+ lymphocyte populations of interest were compared in each group. P values are shown above.

### Figure E1.

A. Expression of Sema 7a relative to  $\beta$ -actin in PBMCs obtained from control (white, n=15) and IPF (black, n=15) subjects. B-C. Comparison of percentages (right) and quantities (left) of CD4+ cells (B) and CD19+ cells (C) in PBMCs obtained from control (white bar, n=42) and IPF (black bar, n=38). Because gating for CD4 and CD19 cells were performed using different staining techniques (with and without permeabilization, respectively), the CD4 and C19 data are not directly comparable. Data are expressed as mean +/- standard error.

### Figure E2.

A. Comparison of percentages (right) and quantities (left) of Sema 7a+ monocytes in control (white bar) vs IPF (black bar). B. Percentages (left) and quantities (right) of Sema 7a+ CD8+ cells do not differ between control (white) and IPF (black) PBMCs. C) Percentages and quantities of Tregs in control vs IPF. D) Percentages (right) and quantities (left) of Sema 7a+CD4+CD25- cells in control (white) vs IPF (black) PBMCs. E.) Percentages and quantities of Sema 7a-CD4+CD25+FoxP3+ cells in stable (black) vs. progressive (checkered) IPF. F.) Percentage and quantities of CD4+CD25+FoxP3+ cells in stable (black) vs. progressive (checkered) IPF. \*\*\*\*p<0.0001. For all comparisons, IPF n = 38 and control n = 42.

### Figure E3.

Flow cytometric detection of CD4 cells co-expressing A) IFN- $\gamma$  B) IL-4 C) IL-17A, along with D) CD4+CD25+FoxP3+ Tregs in lung cells obtained from TGF- $\beta$ 1 Tg+ x Sema 7a -/- mice transplanted with WT BMDCs (black line) or Sema 7a-/- bone marrow (dotted line). Analysis was performed at 48 hours, 7 days, and 14 days post transplant. N $\geq$ 4 mice per group, one iteration. \*p<0.05.

## SUPPLEMENTAL REFERENCES

1. Pasterkamp RJ, Peschon JJ, Spriggs MK, Kolodkin AL. Semaphorin 7a promotes axon outgrowth through integrins and mapks. *Nature* 2003;424:398-405.
2. American thoracic society/european respiratory society international multidisciplinary consensus classification of the idiopathic interstitial pneumonias. This joint statement of the american thoracic society (ats), and the european respiratory society (ers) was adopted by the ats board of directors, june 2001 and by the ers executive committee, june 2001. *Am J Respir Crit Care Med* 2002;165:277-304.
3. Raghu G, Collard HR, Egan JJ, Martinez FJ, Behr J, Brown KK, Colby TV, Cordier JF, Flaherty KR, Lasky JA, et al. An official ats/ers/jrs/alat statement: Idiopathic pulmonary fibrosis: Evidence-based guidelines for diagnosis and management. *Am J Respir Crit Care Med* 2011;183:788-824.
4. Collard HR, Moore BB, Flaherty KR, Brown KK, Kaner RJ, King TE, Jr., Lasky JA, Loyd JE, Noth I, Olman MA, et al. Acute exacerbations of idiopathic pulmonary fibrosis. *Am J Respir Crit Care Med* 2007;176:636-643.
5. Gan Y, Reilkoff R, Peng X, Russell T, Chen Q, Mathai SK, Homer R, Gulati M, Siner J, Elias J, et al. Role of semaphorin 7a signaling in transforming growth factor beta1-induced lung fibrosis and scleroderma-related interstitial lung disease. *Arthritis Rheum*;63:2484-2494.
6. Fantini MC, Dornitzki S, Rizzo A, Neurath MF, Becker C. In vitro generation of cd4+ cd25+ regulatory cells from murine naive t cells. *Nat Protoc* 2007;2:1789-1794.
7. D'Alessio FR, Tsushima K, Aggarwal NR, West EE, Willett MH, Britos MF, Pipeling MR, Brower RG, Tudor RM, McDyer JF, et al. Cd4+cd25+foxp3+ tregs resolve experimental lung injury in mice and are present in humans with acute lung injury. *J Clin Invest* 2009;119:2898-2913.
8. Yao H, Edirisinghe I, Rajendrasozhan S, Yang SR, Caito S, Aduena D, Rahman I. Cigarette smoke-mediated inflammatory and oxidative responses are strain-dependent in mice. *Am J Physiol Lung Cell Mol Physiol* 2008;294:L1174-1186.
9. Mathai SK, Gulati M, Peng X, Russell TR, Shaw AC, Rubinowitz AN, Murray LA, Siner JM, Antin-Ozerkis DE, Montgomery RR, et al. Circulating monocytes from systemic sclerosis patients with interstitial lung disease show an enhanced profibrotic phenotype. *Lab Invest* 2010;90:812-823.
10. Murray LA, Chen Q, Kramer MS, Hesson DP, Argentieri RL, Peng X, Gulati M, Homer RJ, Russell T, van Rooijen N, et al. Tgf-beta driven lung fibrosis is macrophage dependent and blocked by serum amyloid p. *Int J Biochem Cell Biol* 2011; **43**: 154-62



**A**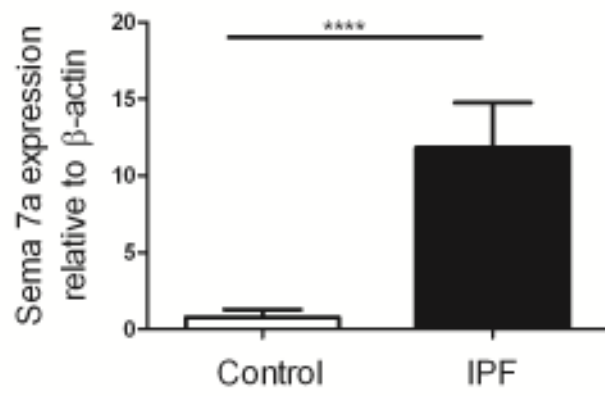**B**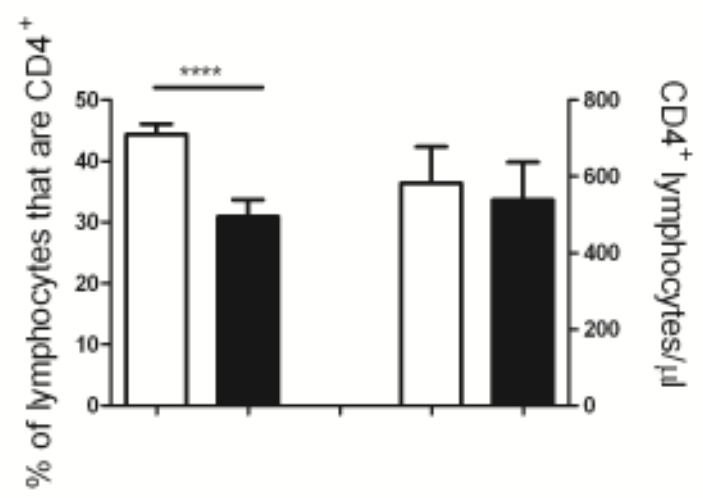**C**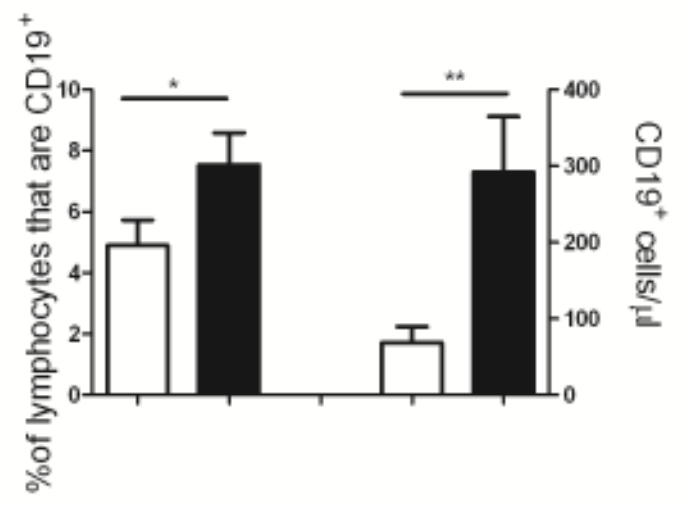

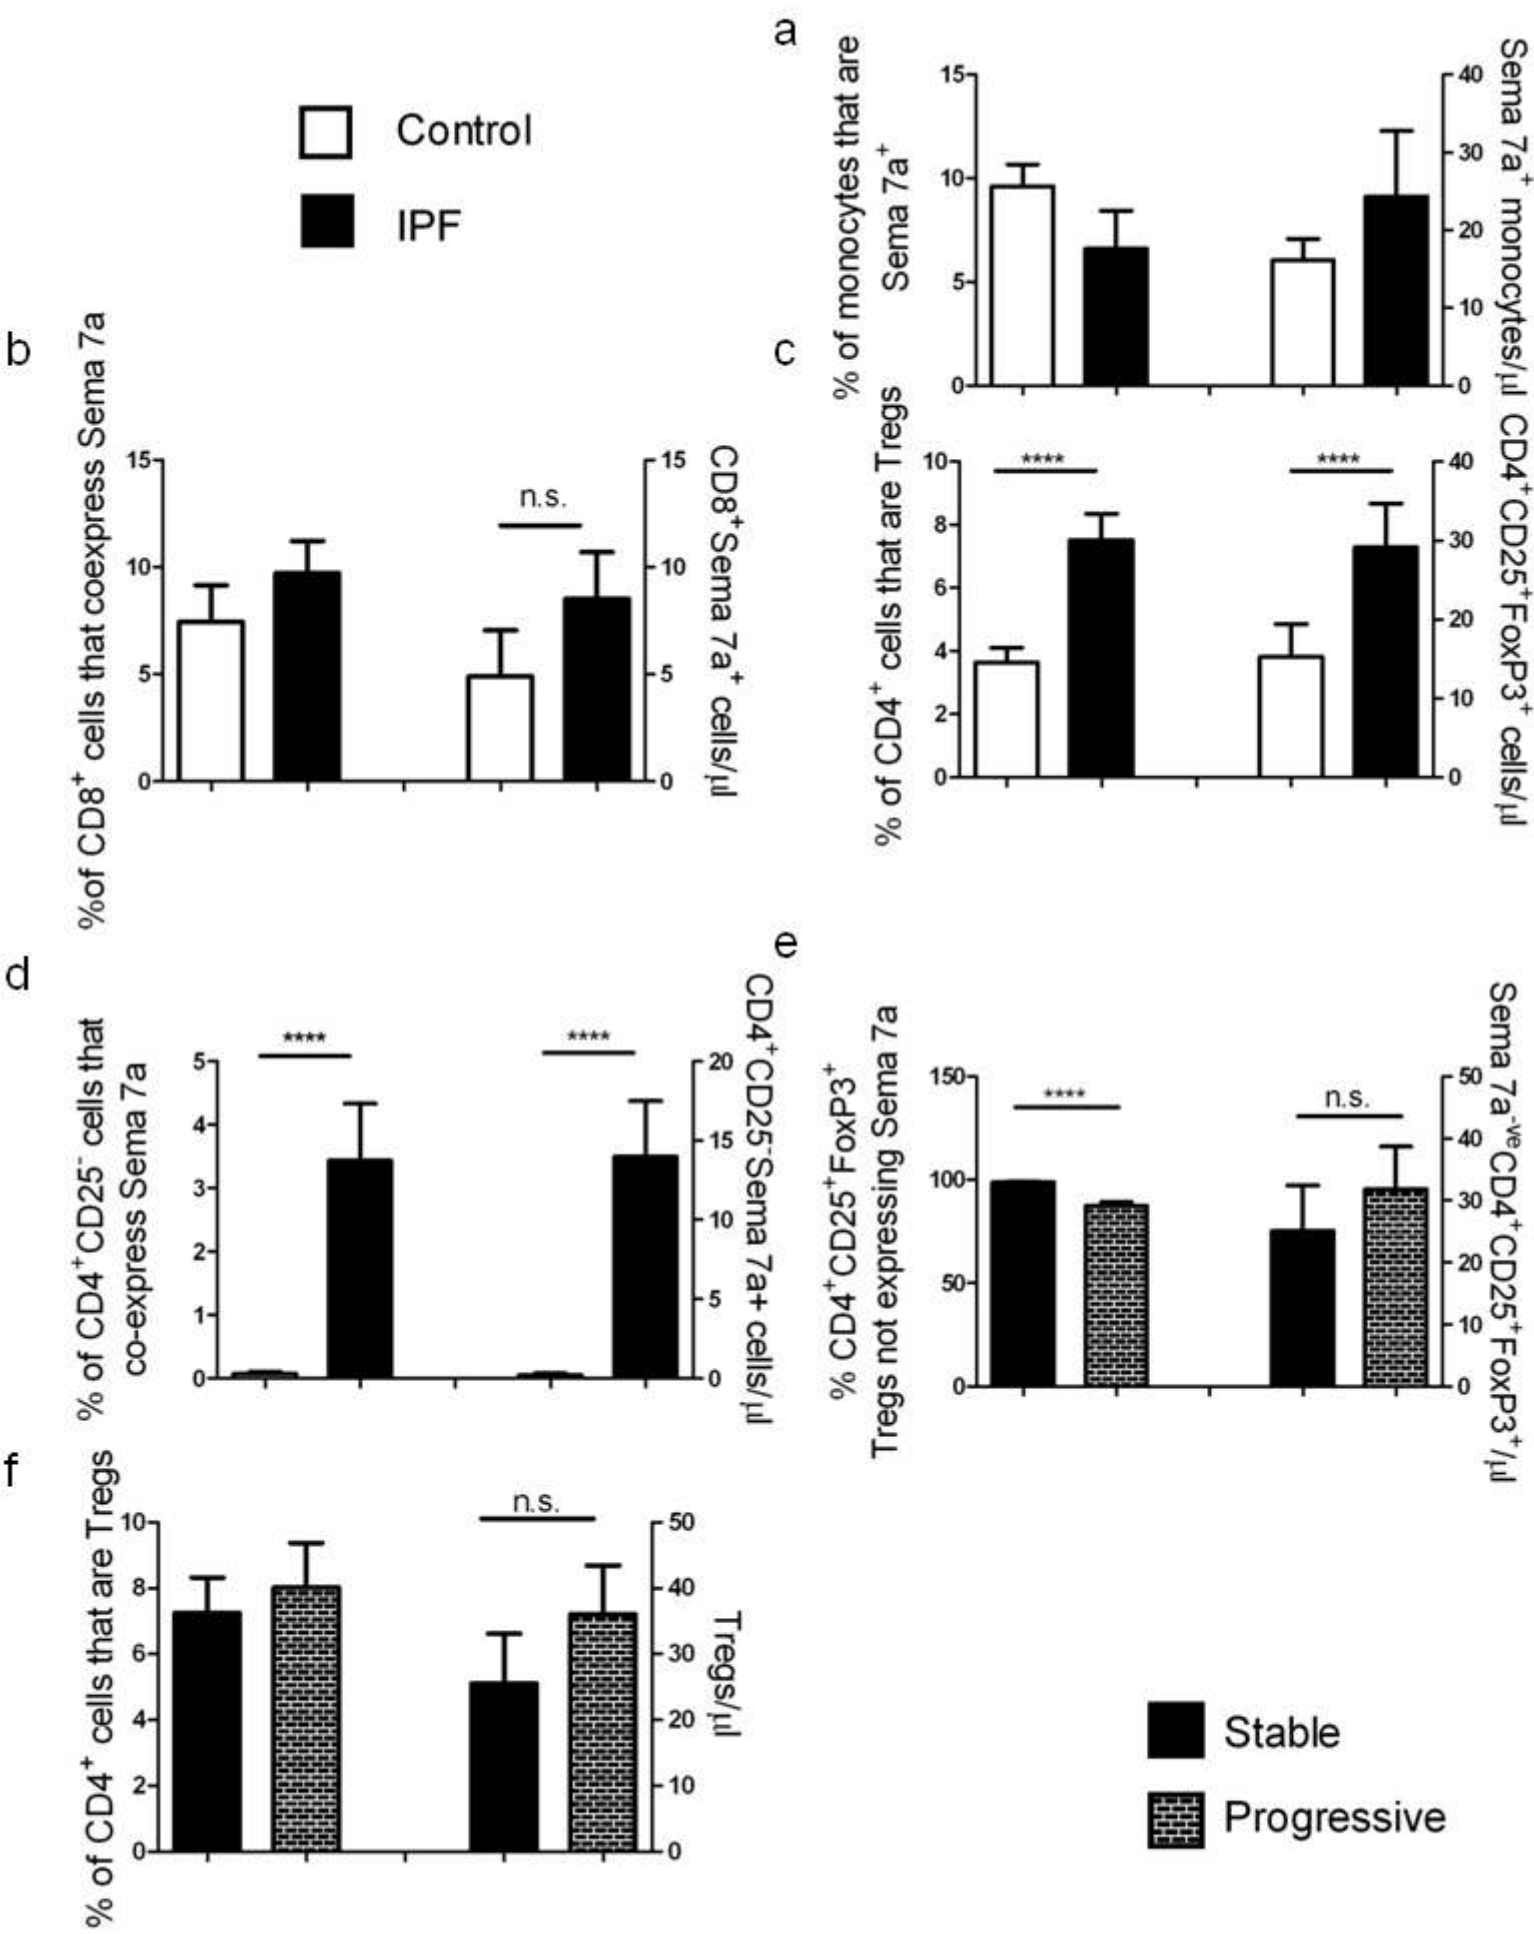

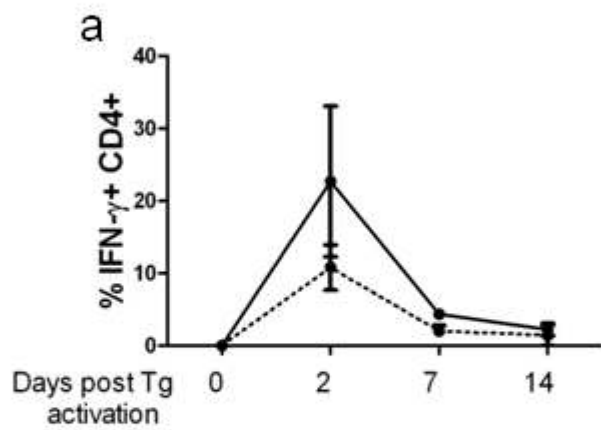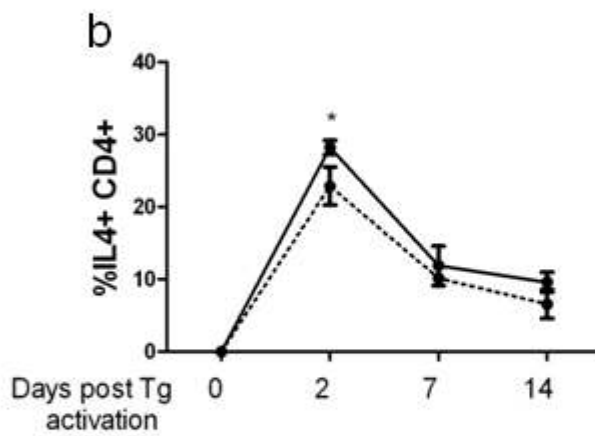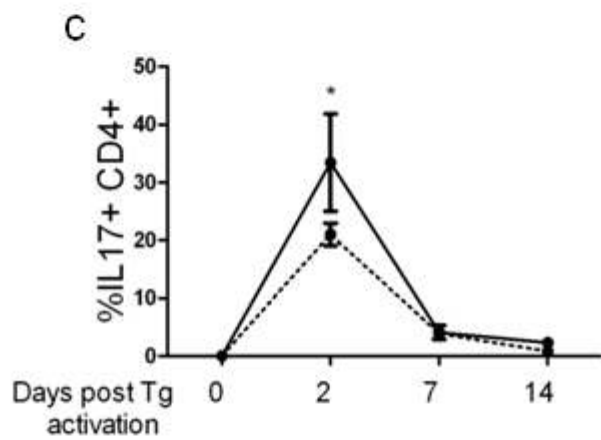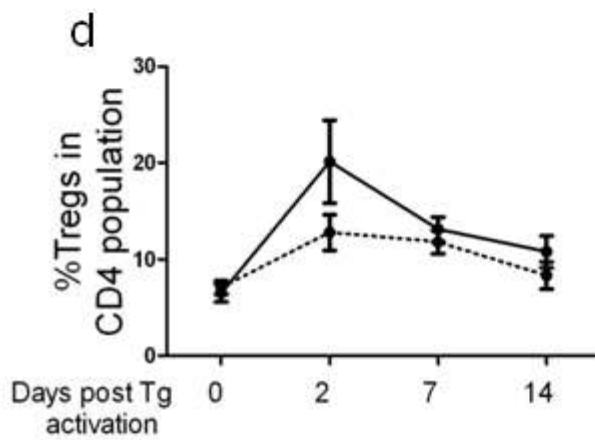

Supplement: supp_187.2.180_Reilkoff_ODS.pdf [file supp_187.2.180_Reilkoff_ODS.pdf]
